# Supplementary material
Source: PubMed Central journal article supplement (PMC3273989)
Supplement: NIHMS349655-supplement-01.pdf [file NIHMS349655-supplement-01.pdf]

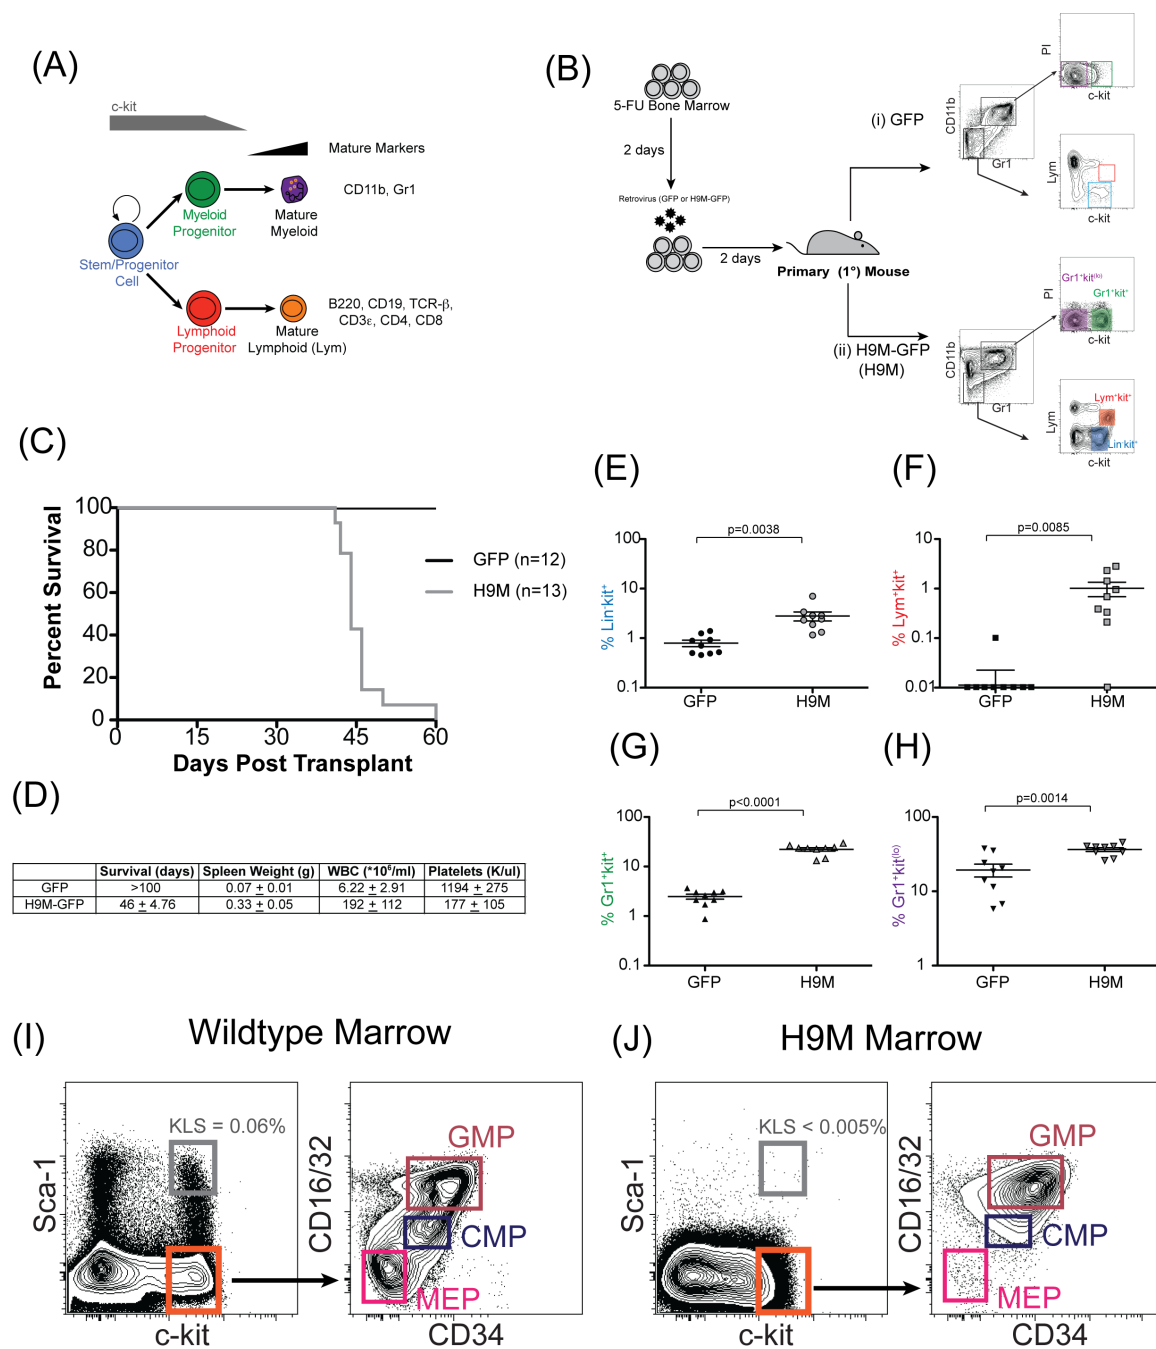

**Figure S1, related to Figure 1. Experimental System.** (A) Simplified model of normal hematopoiesis. (B) Experimental scheme for retroviral transduction. The bone marrow from mice injected 4 days prior with 5-fluorouracil was harvested, cultured for 2 days, transduced, and cultured for two additional days (to allow for GFP expression). GFP<sup>+</sup> cells were sorted, and 10<sup>5</sup> cells were transplanted into lethally irradiated primary recipients along with 10<sup>5</sup> helper marrow cells animals.

Phenotypic analysis of GFP<sup>+</sup> compartment of bone marrow from animals transplanted with (i) GFP transduced or (ii) H9M-GFP transduced cells. (C) Survival curve of animals transplanted with GFP (black) or H9M (grey) cells. (D) Characteristics of mice transplanted with GFP or H9M-GFP cells. Values represent mean  $\pm$  SD. (E-G) Percentage of (E) Lin<sup>-</sup>kit<sup>+</sup>, (F) Lym<sup>+</sup>kit<sup>+</sup>, (G) Gr1<sup>+</sup>kit<sup>+</sup>, and (H) Gr1<sup>+</sup>kit<sup>(lo)</sup> cells in the bone marrow of animals transplanted with GFP or H9M cells. (I,J) Flow cytometric hematopoietic progenitor analysis of bone marrow from (I) wildtype or (J) H9M mice.

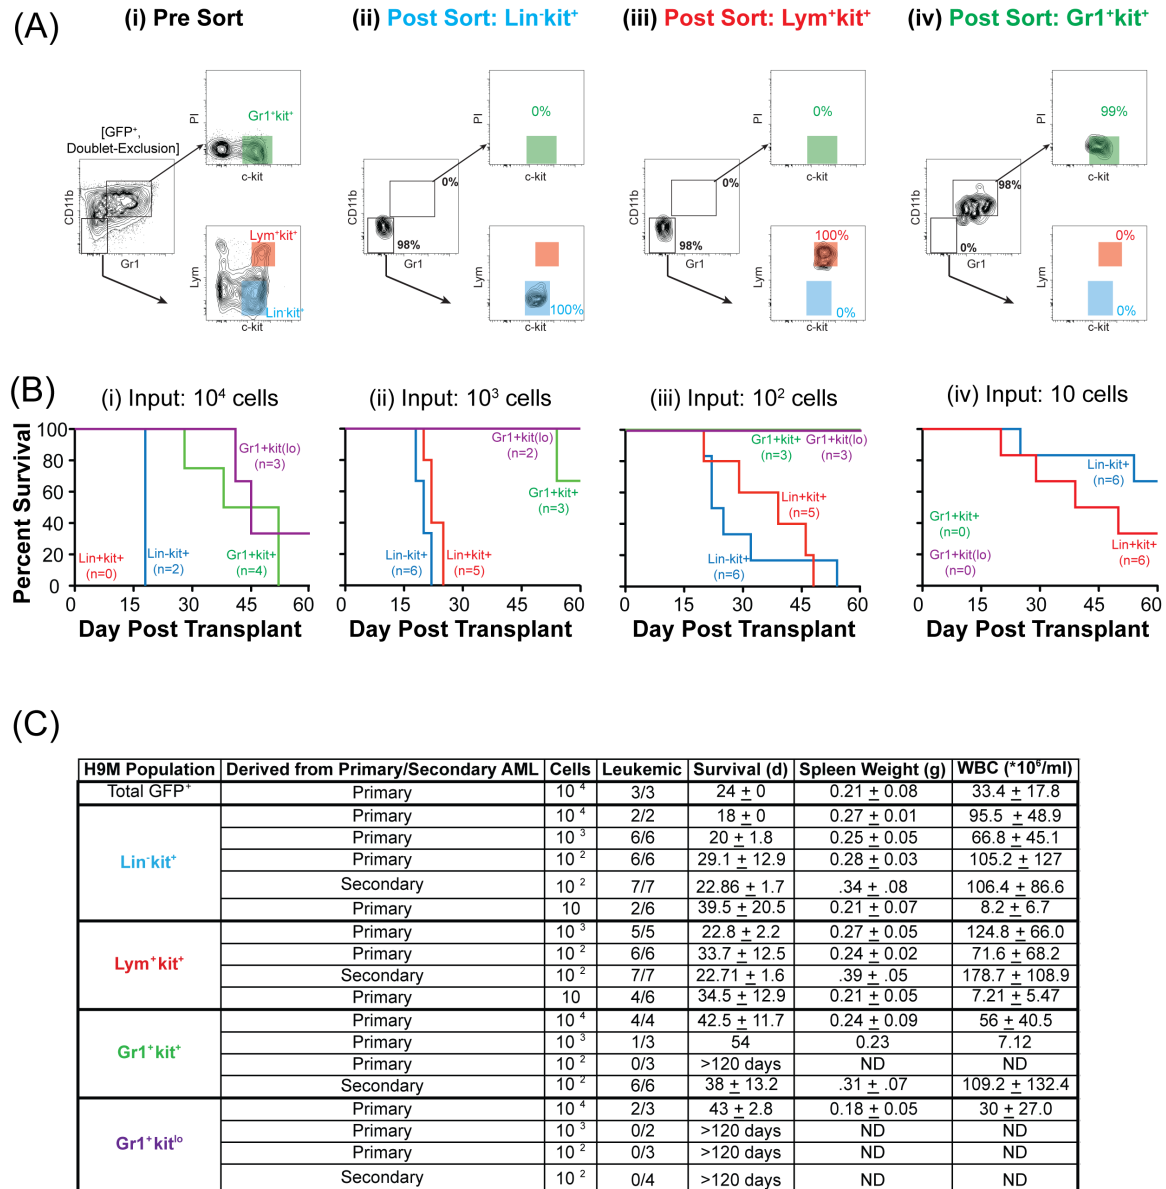

**Figure S2, related to Figure 1. Potency of TICs by Cell Number in Primary & Secondary H9M AML.** (A) High efficiency FACS purification of TICs. Representative flow cytometric analysis of the GFP<sup>+</sup> fraction H9M bone marrow (i) before sorting, (ii) post sort for Lin<sup>-</sup>kit<sup>+</sup>, (iii) post sort for Lym<sup>+</sup>kit<sup>+</sup>, and (iv) post sort for Gr1<sup>+</sup>kit<sup>+</sup>. (B) Survival curves for mice transplanted with (i) 10<sup>4</sup>, (ii) 10<sup>3</sup>, (iii) 10<sup>2</sup>, or (iv) 10 cells from the indicated populations from primary H9M AML. (C) Characteristics of leukemic mice transplanted with indicated compartments derived from primary or secondary H9M AML. Values represent mean ± SD.

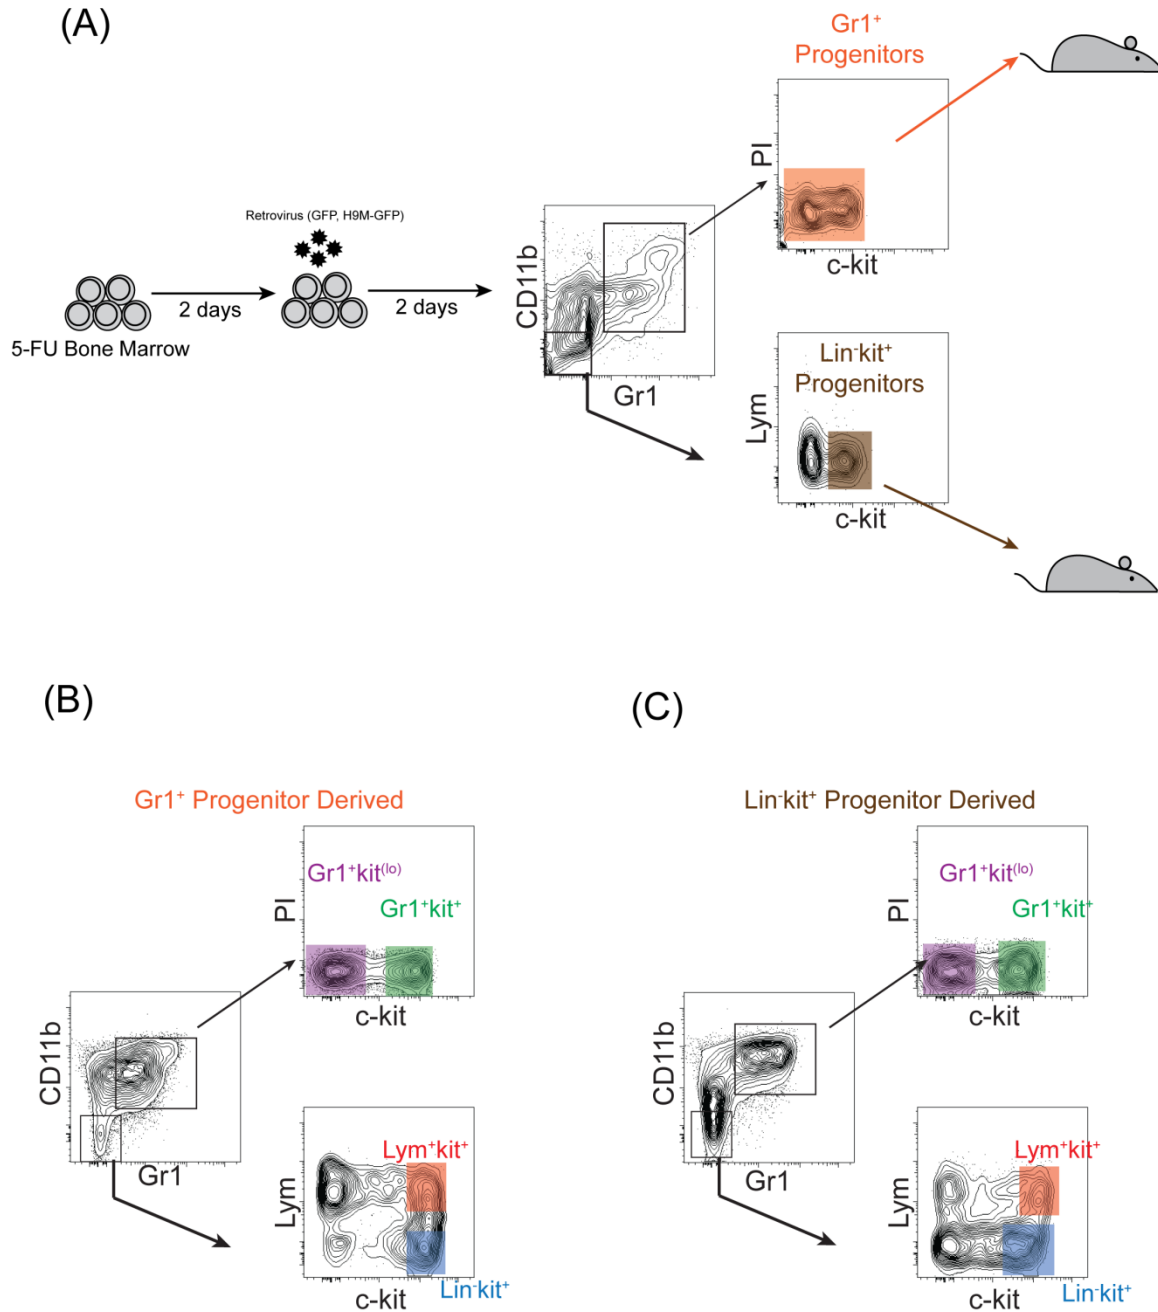

**Figure S3, related to Figure 2. Enforced H9M Expression Permits Surface Marker Plasticity.** (A) Experimental scheme. The bone marrow from mice injected 4 days prior with 5-fluorouracil was harvested, cultured for 2 days, transduced, and cultured for two additional days to allow for GFP expression. GFP<sup>+</sup> cells from these transduced progenitors were FACS purified into Gr1<sup>+</sup> progenitors (orange) or Lin<sup>-</sup>Kit<sup>+</sup> progenitors (brown), and  $\sim 3 \times 10^3$  cells from these purified populations were transplanted into lethally irradiated recipients along with  $10^5$  helper marrow cells. Flow cytometric analysis of the bone marrow of mice that received (B) Gr1<sup>+</sup> progenitors or (C) Lin<sup>-</sup>Kit<sup>+</sup> progenitors.

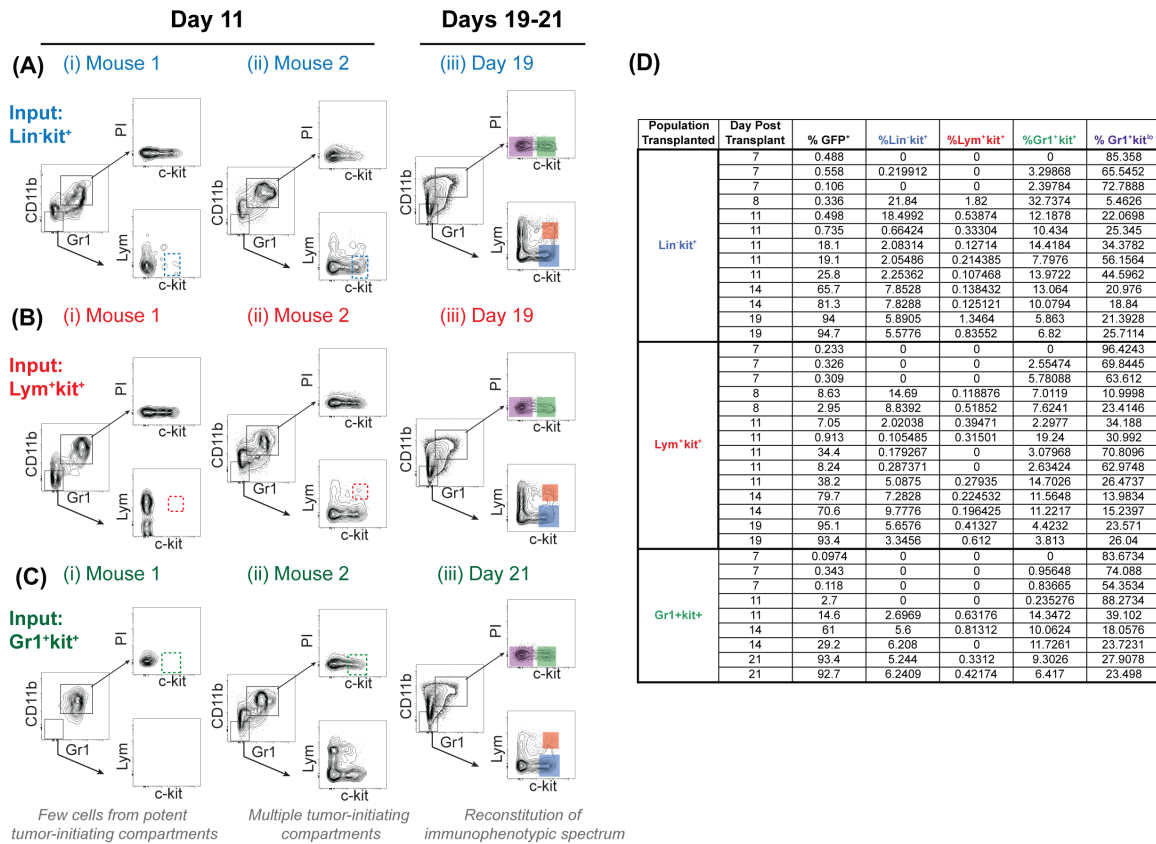

**Figure S4, related to Figure 3. *In Vivo* Tumorigenic Differentiation Does Not Proceed along a Strictly Defined Pathway.** Defined numbers of each tumor-initiating compartment in primary AML were transplanted into secondary recipients. Animals were sacrificed every 3-4 four days thereafter to assess for surface phenotype of engrafted cells. Flow cytometric analysis of representative bone marrow of mice transplanted with (A) 500 Lin<sup>+</sup>kit<sup>+</sup> cells, (B) 500 Lym<sup>+</sup>kit<sup>+</sup> cells, or (C) 2500 Gr1<sup>+</sup>kit<sup>+</sup> cells. Dashed boxes in on day 11 represent the phenotypic compartment transplanted. Shaded regions for mice transplanted on days 19-21 correspond to phenotypic compartments present in primary leukemia. All plots were previously gated on GFP<sup>+</sup> cells. (D) Percentages of each phenotypic compartment in all transplanted.

(A)

| Rank | Gene Name  | Description                                                                                                  |
|------|------------|--------------------------------------------------------------------------------------------------------------|
| 1    | Rag1       | recombination activating gene 1 Gene [Source:MGI Symbol;Acc:MGI:97848]                                       |
| 2    | Pou2af1    | POU domain, class 2, associating factor 1 Gene [Source:MGI Symbol;Acc:MGI:105086]                            |
| 3    | Igk-C      | immunoglobulin kappa chain, constant region Complex/Cluster/Region [Source:MGI Symbol;Acc:MGI:96495]         |
| 4    | Gfra2      | glial cell line derived neurotrophic factor family receptor alpha 2 Gene [Source:MGI Symbol;Acc:MGI:1195462] |
| 5    | Ebf1       | early B-cell factor 1 Gene [Source:MGI Symbol;Acc:MGI:95275]                                                 |
| 6    | Vpreb1     | pre-B lymphocyte gene 1 Gene [Source:MGI Symbol;Acc:MGI:98936]                                               |
| 7    | Vpreb2     | pre-B lymphocyte gene 2 Gene [Source:MGI Symbol;Acc:MGI:98937]                                               |
| 8    | Sdc4       | syndecan 4 Gene [Source:MGI Symbol;Acc:MGI:1349164]                                                          |
| 9    | Igll1      | immunoglobulin lambda-like polypeptide 1 Gene [Source:MGI Symbol;Acc:MGI:96529]                              |
| 10   | St3gal6    | ST3 beta-galactoside alpha-2,3-sialyltransferase 6 Gene [Source:MGI Symbol;Acc:MGI:1888707]                  |
| 11   | Btd11      | BTB (POZ) domain containing 11 Gene [Source:MGI Symbol;Acc:MGI:1921257]                                      |
| 12   | Dntt       | deoxynucleotidyltransferase, terminal Gene [Source:MGI Symbol;Acc:MGI:98659]                                 |
| 13   | Blnk       | B-cell linker Gene [Source:MGI Symbol;Acc:MGI:96878]                                                         |
| 14   | AC079817.3 |                                                                                                              |
| 15   | Igl-C2     | immunoglobulin lambda chain, variable 1 Gene [Source:MGI Symbol;Acc:MGI:96530]                               |
| 16   | AC079817.4 | Ig lambda-3 chain C region [Source:UniProtKB/Swiss-Prot;Acc:P01845]                                          |
| 17   | Tnnt2      | troponin T2, cardiac Gene [Source:MGI Symbol;Acc:MGI:104597]                                                 |
| 18   | Gfra1      | glial cell line derived neurotrophic factor family receptor alpha 1 Gene [Source:MGI Symbol;Acc:MGI:1100842] |
| 19   | Ncam1      | neural cell adhesion molecule 1 Gene [Source:MGI Symbol;Acc:MGI:97281]                                       |
| 20   | Cd19       | CD19 antigen Gene [Source:MGI Symbol;Acc:MGI:88319]                                                          |
|      |            | Defined role in lymphocyte development                                                                       |

(B)

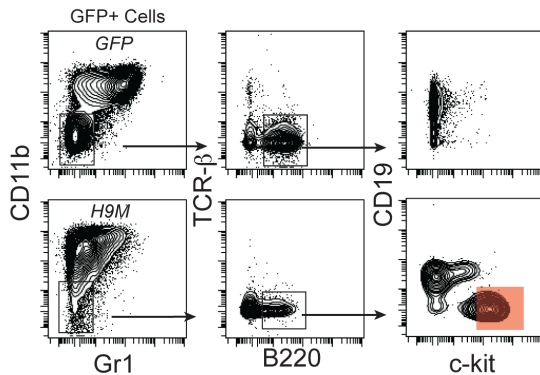

(C)

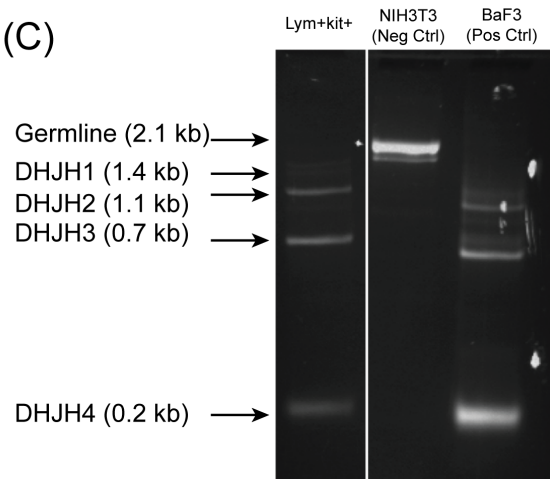

**Supplemental Figure S5, related to Figure 4. Lym<sup>+</sup>kit<sup>+</sup> Fraction represents a B-specified progenitor that initiates myeloid leukemia.**

(A) Table of top 20 genes over-expressed in primary Lym<sup>+</sup>kit<sup>+</sup> in comparison to primary Lin<sup>-</sup>kit<sup>+</sup> cells. Grey boxes indicate genes with a defined role in lymphoid development. (B) Representative mass cytometric analysis of GFP<sup>+</sup> bone marrow of mice transplanted with progenitors transduced with (top) control GFP vector or (bottom) H9M-GFP vector. All surface markers used in analysis found in Table S4. (C) PCR product of genomic immunoglobulin DH-JH rearrangements in Lym<sup>+</sup>kit<sup>+</sup>, NIH3T3 (negative control), or BaF3 (pro B-cell line).

(A)

| Phospho-node     | p-value (One-way ANOVA) |               |
|------------------|-------------------------|---------------|
|                  | G-CSF                   | S36GM         |
| Erk (pT202/Y204) | 0.3565                  | 0.0685        |
| Stat3 (pY705)    | 0.4563                  | 0.3836        |
| Akt (pS473)      | 0.0918                  | 0.9935        |
| S6 (pS235/S236)  | <b>0.0376</b>           | 0.1383        |
| CamKII (pT286)   | 0.2206                  | 0.4603        |
| Stat5 (pY694)    | 0.3186                  | 0.7748        |
| Src (pY418)      | 0.8436                  | 0.673         |
| PLCg2 (pY759)    | 0.0649                  | 0.4614        |
| LCK (pY505)      | 0.9512                  | 0.8278        |
| Stat1 (pY701)    | 0.3318                  | 0.2873        |
| Crkl (pY207)     | 0.6831                  | 0.2048        |
| CREB (pS133)     | 0.0748                  | 0.3446        |
| Rb (pS807/S811)  | 0.9503                  | 0.9587        |
| p38 (pT180/Y182) | 0.3845                  | <b>0.0289</b> |

(B)

| Stimulation                  | G-CSF         | SCF  | IL-3          | IL-6  | GM-CSF        |
|------------------------------|---------------|------|---------------|-------|---------------|
| p-value across phospho-nodes | <b>0.047*</b> | 0.15 | <b>0.016*</b> | 0.054 | <b>0.014*</b> |

**Figure S6, related to Figure 4. Statistical Analysis of Variance in Fold-Change Values between Distinct Tumor-Initiating Compartments and WT Compartments.** (A) One primary and two secondary H9M AML bone marrow samples were stimulated with G-CSF or a cocktail of SCF, IL-3, IL-6, and GM-CSF (S36GM) for 15 minutes. Cells were then fixed to halt signaling, stained for surface markers, permeabilized, stained for intracellular markers and subjected to mass cytometry analysis. Signal-induction values for each tumor-initiating compartment ( $\text{Lin}^-\text{kit}^+$ ,  $\text{Lym}^+\text{kit}^+$ , or  $\text{Gr1}^+\text{kit}^+$ ) were calculated, and ANOVA was employed to test for differences between fold-change values between compartments within tumors. Statistically significant differences are shown in red. (B) Wildtype bone marrow cells and splenocytes were stimulated with either G-CSF, SCF, IL-3, IL-6 or GM-CSF for 15 minutes. Cells were then fixed to halt signaling, permeabilized, and stained for surface markers and intracellular markers. Fold-change values for  $\text{Lym}^+$  and  $\text{Gr1}^+$  cells were calculated, and p-values were determined by pairwise comparison across all intracellular markers (Erk (pT202/Y204), S6 (pS235/S236), Stat1 (pY701), Stat3 (pY705), and Stat5 (pY694)). Values in red are significantly different.

|               |         |          |               |
|---------------|---------|----------|---------------|
| Abca1         | Fads2   | L3mbtl3  | Ssbp2         |
| Abhd1         | Fads3   | Limd1    | Stat5a        |
| Aff3          | Fam102b | Lmna     | Tcf4          |
| Al451557      | Fam49a  | Luzp1    | Tgtp1         |
| Akap12        | Fam65a  | Lyrm5    | Tgtp2         |
| Angpt1        | Fam76b  | Marcks   | Tmem176a      |
| Ap1s3         | Fam84b  | Mef2c    | Tmem176b      |
| Arap2         | Flnb    | Mex3a    | Tns1          |
| Arhgap23      | Flt3    | Mex3b    | Tpm2          |
| Armcx2        | Foxp1   | Mgat4a   | Trim2         |
| Auts2         | Frmd4b  | Mmd      | Trps1         |
| Bcat1         | Fyn     | Mndal    | Tsc22d1       |
| Bcl11a        | Galnt6  | Msi2     | Tspan13       |
| Bcl2          | Gata2   | Mtap7    | Ttc3          |
| Bend4         | Gm11663 | Mycbp    | Tubb2b        |
| Bpil2         | Gm336   | Noc3l    | Zbed3         |
| Brd1          | Gpr171  | No19     | Zfp260        |
| C230081A13Rik | Gpr174  | Nsmaf    | Zmym5         |
| C2cd3         | Gpr56   | Oosp1    | 2010001M09Rik |
| Calcl         | Gramd4  | Pde4b    | 2610307P16Rik |
| Capn5         | H2-Ob   | Pdgfrb   | 4930453N24Rik |
| Cand2         | Haghl   | Pdzd4    | 5730469M10Rik |
| Ccr2          | Hba-a1  | Plek     |               |
| Cd163         | Hba-a2  | Psd3     |               |
| Cd180         | Hbb-b1  | Ptar1    |               |
| Cd27          | Hbb-b2  | Ptger4   |               |
| Cd34          | Hlf     | Ptms     |               |
| Cd72          | Hmgn1   | Rgs12    |               |
| Clec10a       | Hmgn3   | Rhoq     |               |
| Cnn3          | Hpvc-ps | Rnf220   |               |
| Cpa3          | Ict1    | Runx1    |               |
| Ctla2a        | Ifi203  | Satb1    |               |
| Ctr9          | Il17rb  | Sdc1     |               |
| Cux1          | Il2rg   | Sdcbp    |               |
| Cxxc5         | Il6st   | Sepw1    |               |
| Dab2ip        | Il7r    | Serpini1 |               |
| Ddx4          | Ints5   | Slc15a2  |               |
| Dnmt3a        | Itgax   | Slc44a1  |               |
| Dpysl2        | Jak3    | Sfn5     |               |
| Ednra         | Jakmip1 | Smad1    |               |
| Elk3          | Kank2   | Socs2    |               |
| Emid1         | Kcnn4   | Sox4     |               |
| Epb4.1l4b     | Kif16b  | Spred1   |               |

**Table S1, related to Figure 4. List of Genes shared, enriched in primary H9M Tumor-Initiating Compartments (Lin<sup>+</sup>kit<sup>+</sup> and Lym<sup>+</sup>kit<sup>+</sup>) relative to Gr1<sup>+</sup>kit<sup>+</sup>.**



| Antigen              | Supplier                  | Clone        | Element | Isotope           | Final conc. (µg/mL)          |
|----------------------|---------------------------|--------------|---------|-------------------|------------------------------|
| B220                 | Invitrogen                | RA3-6B2      | Cd      | 110,111, 112, 114 | 1:500 dilution of 1 mM stock |
| Gr-1                 | BD Biosciences            | RB6-8C5      | La      | 139               | 2                            |
| PLCgamma2 (pY759)    | BD Biosciences            | K86-689.37   | Pr      | 141               | 1                            |
| GFP                  | Biolegend                 | FM264G       | Nd      | 142               | 2                            |
| p38 (pT180/Y182)     | BD Biosciences            | clone 36/p38 | Nd      | 144               | 2                            |
| CD4                  | Biolegend                 | RM-4.5       | Nd      | 145               | 2                            |
| CD8a                 | Biolegend                 | 53-6.7       | Nd      | 146               | 2                            |
| CD45                 | Biolegend                 | 30-F11       | Sm      | 147               | 2                            |
| CD11b                | BD Biosciences            | M1/70        | Nd      | 148               | 2                            |
| Stat5 (pY694)        | BD Biosciences            | 47           | Nd      | 150               | 2                            |
| Erk 1/2 (pT202/Y204) | BD Biosciences            | 20A          | Eu      | 151               | 1                            |
| Akt (pS473)          | Cell Signaling Technology | 193H12       | Sm      | 152               | 4                            |
| Stat1 (pY701)        | BD Biosciences            | 4a           | Eu      | 153               | 2                            |
| Stat3 (pY705)        | BD Biosciences            | 4            | Gd      | 158               | 2                            |
| Sca-1                | Biolegend                 | E13-161.7    | Dy      | 162               | 2                            |
| CD19                 | Biolegend                 | 1D3          | Dy      | 164               | 2                            |
| Rb (pS807/S811)      | BD Biosciences            | J112-906     | Ho      | 165               | 0.4                          |
| cPARP                | BD Biosciences            | F21-852      | Er      | 167               | 1                            |
| pCAMKII              | Cell Signaling Technology | polyclonal   | Er      | 168               | 2                            |
| TCR-β                | BD Biosciences            | H57-597      | Tm      | 169               | 2                            |
| c-kit                | Biolegend                 | 2B8          | Er      | 170               | 2                            |
| LCK (pY505)          | BD Biosciences            | 4            | Yb      | 171               | 2                            |
| S6 (pS235/S236)      | BD Biosciences            | N7-548       | Yb      | 172               | 2                            |
| Src (pY418)          | BD Biosciences            | K98-37       | Yb      | 174               | 2                            |
| CrkL (pY207)         | Cell Signaling Technology | polyclonal   | Lu      | 175               | 2                            |
| Creb (pS133)         | Cell Signaling Technology | 87G3         | Yb      | 176               | 1.5                          |

**Table S2, related to Figure 4. A Summary of Antibodies used in Mass Cytometry Analysis.**

## Supplemental Experimental Procedures

### *Flow Cytometric Analysis*

The following antibodies and clones were used to analyze and FACS sort leukemic marrow and splenocytes: CD11b (M1/70), Gr1 (RB6-8C5), c-kit (2B8), B220 (RA3-6B2), TCR- $\beta$  (H57-597), CD3 $\epsilon$  (145-2C11), CD4 (RM-4.5), CD8a (53-6.7), and CD19 (1D3). Lymphoid (Lym) cocktail included B220, CD19, CD3 $\epsilon$ , CD4, CD8a, and TCR- $\beta$ .

### *PCR*

Detection of genomic immunoglobulin DH-JH rearrangement was conducted as previously described (Deshpande et al., 2006). Briefly, two upstream degenerate primers binding 50 of the DFL/DSP element or the DQ52 element and a reverse primer complementary to a binding site downstream of the JH4 segment were used in a single PCR reaction (denaturation at 94°C for 1 minute followed by 35 cycles of 1 minute at 94°C, 1 minute at 60°C, and 1 minute 45 seconds at 72°C with a final extension at 72°C for 10 minutes).

### *In vivo pharmacologic inhibition*

Inhibitors and doses used for inhibition were chosen based on previously described work (Milella et al., 2001; Ozawa et al., 2008; Schmelz et al., 2005; Solit et al., 2006; Stirewalt and Meshinchi, 2010; Wang et al., 2011; Xu et al., 2005; Yilmaz et al., 2006; Zorn et al., 2007).

## Supplemental References

Deshpande, A.J., Cusan, M., Rawat, V.P., Reuter, H., Krause, A., Pott, C., Quintanilla-Martinez, L., Kakadia, P., Kuchenbauer, F., Ahmed, F., *et al.* (2006). Acute myeloid leukemia is propagated by a leukemic stem cell with lymphoid characteristics in a mouse model of CALM/AF10-positive leukemia. *Cancer Cell* **10**, 363-374.

Milella, M., Kornblau, S.M., Estrov, Z., Carter, B.Z., Lapillonne, H., Harris, D., Konopleva, M., Zhao, S., Estey, E., and Andreeff, M. (2001). Therapeutic targeting of the MEK/MAPK signal transduction module in acute myeloid leukemia. *J Clin Invest* **108**, 851-859.

Ozawa, Y., Williams, A.H., Estes, M.L., Matsushita, N., Boschelli, F., Jove, R., and List, A.F. (2008). Src family kinases promote AML cell survival through activation of signal transducers and activators of transcription (STAT). *Leuk Res* **32**, 893-903.

Schmelz, K., Sattler, N., Wagner, M., Lubbert, M., Dorken, B., and Tamm, I. (2005). Induction of gene expression by 5-Aza-2'-deoxycytidine in acute myeloid leukemia (AML) and myelodysplastic syndrome (MDS) but not epithelial cells by DNA-methylation-dependent and -independent mechanisms. *Leukemia* **19**, 103-111.

Solit, D.B., Garraway, L.A., Pratilas, C.A., Sawai, A., Getz, G., Basso, A., Ye, Q., Lobo, J.M., She, Y., Osman, I., *et al.* (2006). BRAF mutation predicts sensitivity to MEK inhibition. *Nature* **439**, 358-362.

Stirewalt, D.L., and Meshinchi, S. (2010). Receptor tyrosine kinase alterations in AML - biology and therapy. *Cancer Treat Res* **145**, 85-108.

Wang, Y.Y., Zhao, L.J., Wu, C.F., Liu, P., Shi, L., Liang, Y., Xiong, S.M., Mi, J.Q., Chen, Z., Ren, R., *et al.* (2011). C-KIT mutation cooperates with full-length AML1-ETO to induce acute myeloid leukemia in mice. *Proc Natl Acad Sci U S A* **108**, 2450-2455.

Xu, Q., Thompson, J.E., and Carroll, M. (2005). mTOR regulates cell survival after etoposide treatment in primary AML cells. *Blood* **106**, 4261-4268.

Yilmaz, O.H., Valdez, R., Theisen, B.K., Guo, W., Ferguson, D.O., Wu, H., and Morrison, S.J. (2006). Pten dependence distinguishes haematopoietic stem cells from leukaemia-initiating cells. *Nature* **441**, 475-482.

Zorn, C.S., Wojno, K.J., McCabe, M.T., Kuefer, R., Gschwend, J.E., and Day, M.L. (2007). 5-aza-2'-deoxycytidine delays androgen-independent disease and improves survival in the transgenic adenocarcinoma of the mouse prostate mouse model of prostate cancer. *Clin Cancer Res* **13**, 2136-2143.
